# Supplementary material for: Early Embryonic Expression of AP-2α Is Critical for Cardiovascular Development
Source: PubMed Central journal article supplement (PMC7570199; doi:10.3390/jcdd7030027), 2020-07-23
Supplement: jcdd-07-00027-s001.pdf [file jcdd-07-00027-s001.pdf]

## Supplementary files

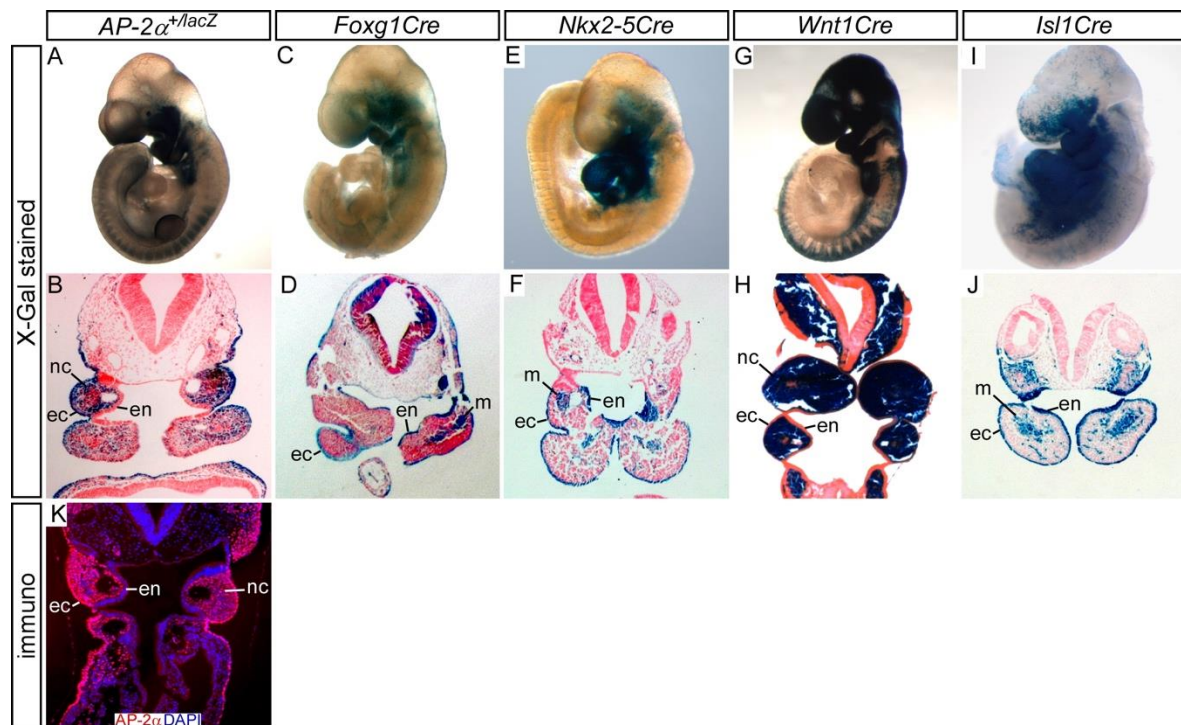

**Figure S1.** E9.5 mouse embryos stained to show expression of lacZ from the *AP-2 $\alpha$ <sup>lacZ</sup>* allele (**A, B**) and from the *R26R<sup>lacZ</sup>* allele following Cre-mediated recombination from the alleles used in this study (**C–J**). Whole embryos (**A, C, E, G, I**) and transverse sections counter-stained with eosin (**B, D, F, H, J**) are shown. Note that these Cre transgenes have complex expression patterns outside the pharyngeal region, and we have not assessed how these patterns might cause the observed craniofacial defects. (**K**) Coronal section of a control E9.5 embryo showing AP-2 $\alpha$  protein expression in the pharyngeal ectoderm and neural crest cells by immuno-staining. Abbreviations: ec, pharyngeal ectoderm; en, pharyngeal endoderm; m, mesoderm; nc, neural crest cells.

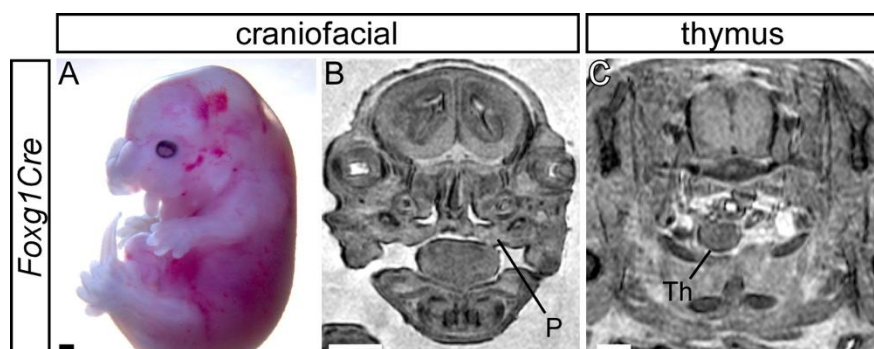

**Figure S2.** Non-cardiac defects following conditional deletion of *AP-2 $\alpha$*  using *Foxg1Cre*. Embryos at E15.5 show craniofacial (**A, B**) and thymus (**C**) defects. Abbreviations: P, palate; Th, thymus. Scale, 500  $\mu$ m.
